# Supplementary material
Source: PubMed Central journal article supplement (PMC3615652)

**A**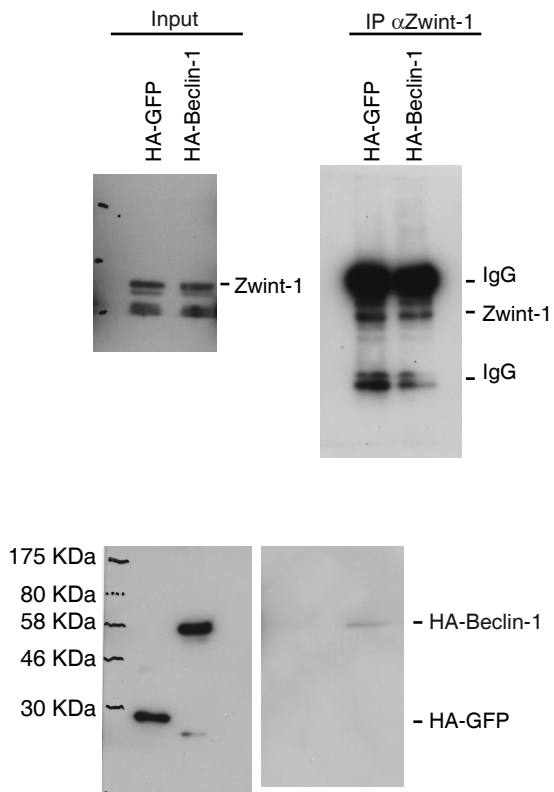**B**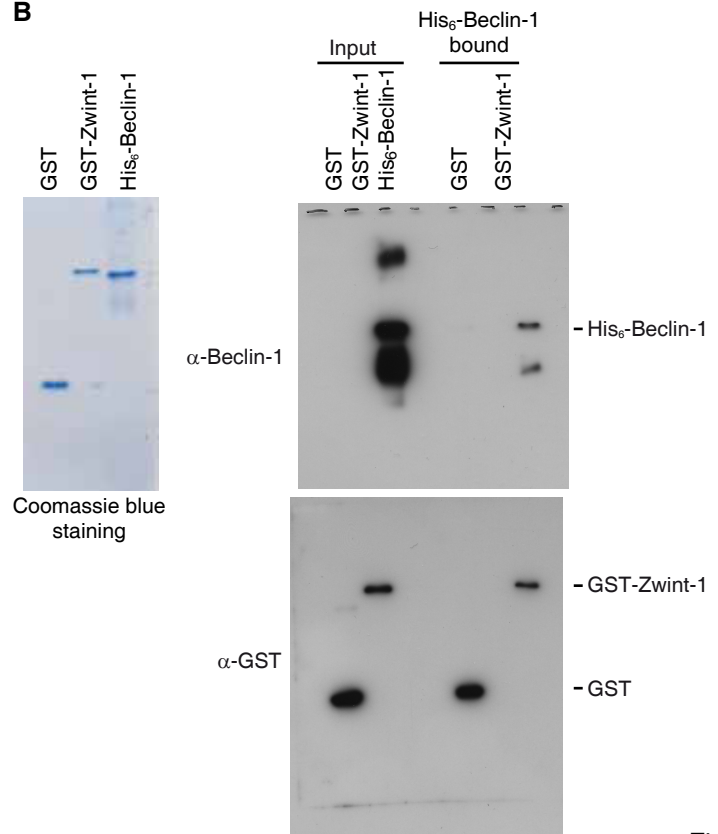

Figure 5

Supplement: embor201323df5.pdf [file embor201323df5.pdf]

**A**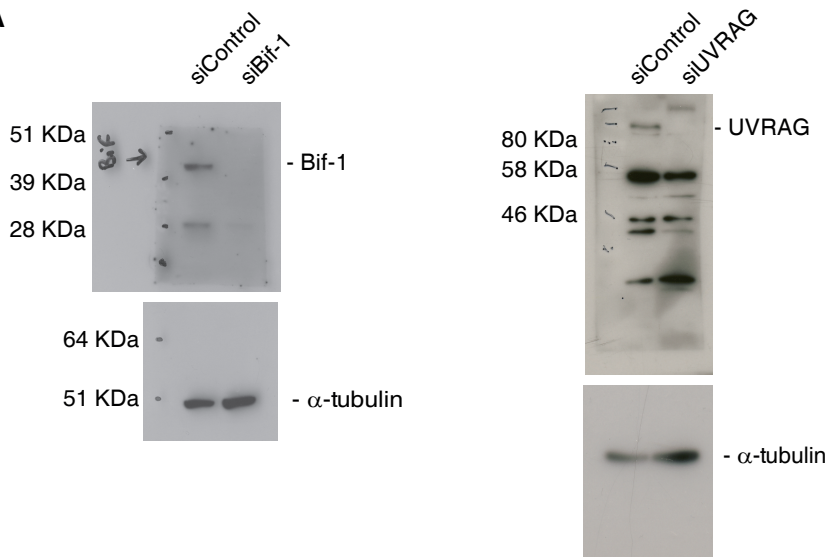**B**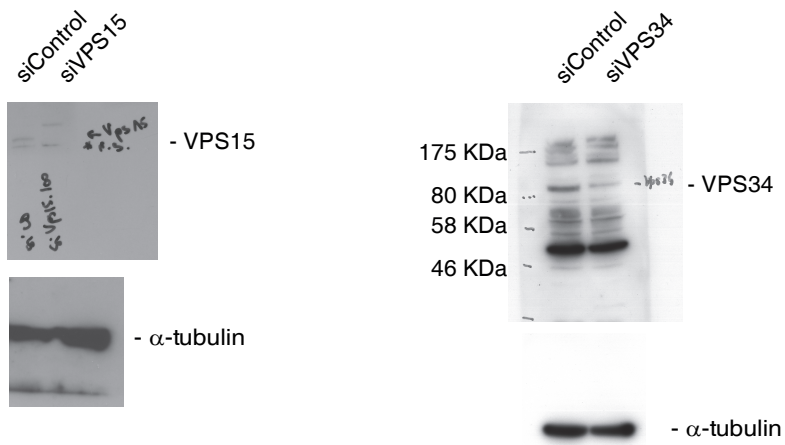**C**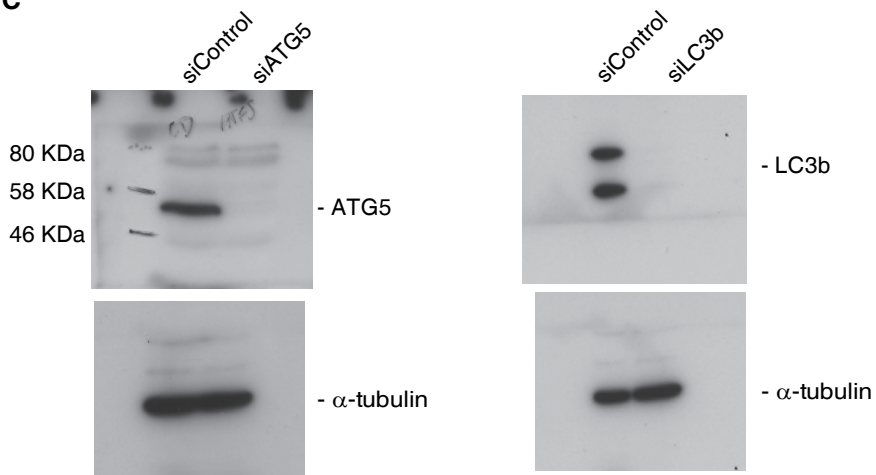

Supplementary Figure S3

Supplement: embor201323dfs3.pdf [file embor201323dfs3.pdf]
